# Supplementary material for: Prognostic Value of Combined Analysis of CTLA-4 and PLR in Esophageal Squamous Cell Carcinoma (ESCC) Patients
Source: Hindawi journal article supplement (doi:10.1155/2019/1601072), 2019-08-14
Supplement: f1 [file 1601072.f1.pdf]

Table S1 Comparison of clinicopathologic characteristics between T-CTLA-4(-) +PLR (-) and other group of ESCC patients without concurrent inflammatory disease

| Clinicopathologic characteristics   | N  | T-CTLA-4(-) +PLR (-) | Other | P value |
|-------------------------------------|----|----------------------|-------|---------|
| <b>Gender</b>                       |    |                      |       |         |
| Male                                | 54 | 25                   | 29    | 0.620   |
| Female                              | 4  | 1                    | 3     |         |
| <b>Age (years)</b>                  |    |                      |       |         |
| <70                                 | 50 | 22                   | 28    | 1.000   |
| ≥70                                 | 8  | 4                    | 4     |         |
| <b>KPS</b>                          |    |                      |       |         |
| >80%                                | 31 | 14                   | 17    | 0.956   |
| ≤80%                                | 27 | 12                   | 15    |         |
| <b>Weight loss (kg)</b>             |    |                      |       |         |
| <5                                  | 40 | 18                   | 22    | 0.969   |
| ≥5                                  | 18 | 8                    | 10    |         |
| <b>Drinking</b>                     |    |                      |       |         |
| Yes                                 | 23 | 9                    | 14    | 0.479   |
| No                                  | 35 | 17                   | 18    |         |
| <b>Smoking</b>                      |    |                      |       |         |
| Yes                                 | 37 | 17                   | 20    | 0.820   |
| No                                  | 21 | 9                    | 12    |         |
| <b>Histological differentiation</b> |    |                      |       |         |
| Well and moderate                   | 31 | 12                   | 19    | 0.315   |
| Poor                                | 27 | 14                   | 13    |         |
| <b>Tumor length (cm)</b>            |    |                      |       |         |
| <3                                  | 14 | 8                    | 6     | 0.287   |
| ≥3                                  | 44 | 18                   | 26    |         |
| <b>Infiltration depth</b>           |    |                      |       |         |
| T1 and T2                           | 17 | 9                    | 8     | 0.424   |
| T3 and T4                           | 41 | 17                   | 24    |         |
| <b>Lymph node status</b>            |    |                      |       |         |
| N0                                  | 38 | 19                   | 19    | 0.275   |
| N1                                  | 20 | 7                    | 13    |         |
| <b>pTNM staging</b>                 |    |                      |       |         |
| I and II                            | 39 | 19                   | 20    | 0.393   |
| III                                 | 19 | 7                    | 12    |         |

Abbreviations: T-CTLA-4, tumor cells cytotoxic T-lymphocyte-associated antigen-4; PLR, platelet lymphocyte ratio; ESCC, esophageal squamous cell carcinoma; KPS, Karnofsky
